# Supplementary material for: Survival marker genes of colorectal cancer derived from consistent transcriptomic profiling
Source: PubMed Central journal article supplement (PMC6288855; doi:10.1186/s12864-018-5193-9), 2018-12-11

Figure S1

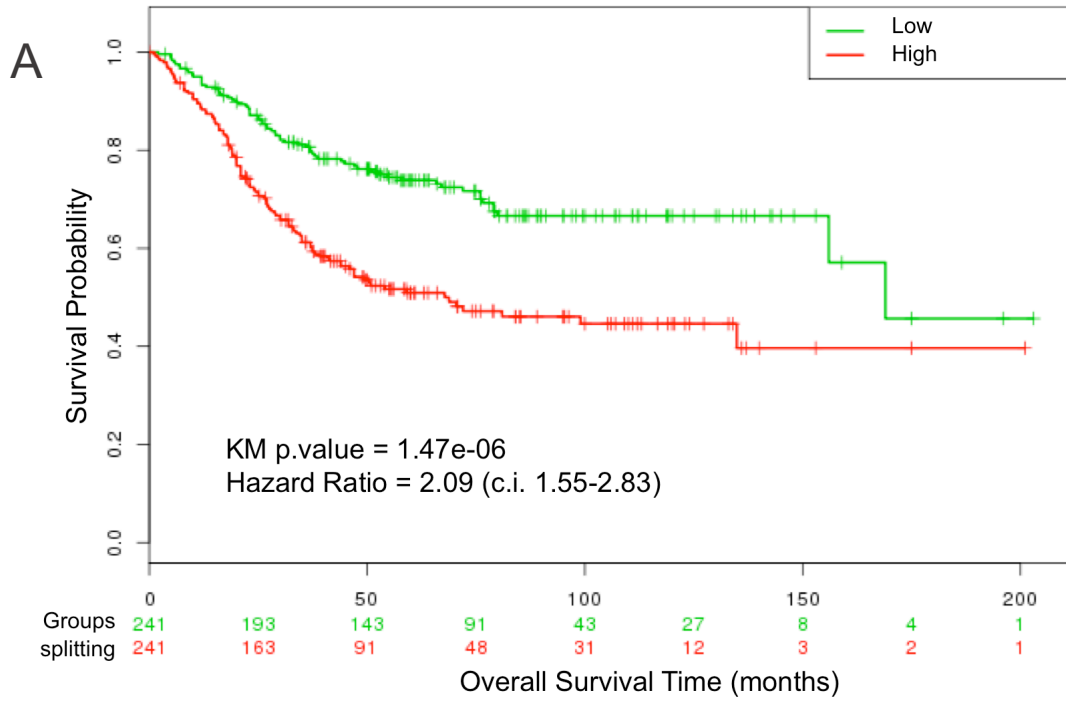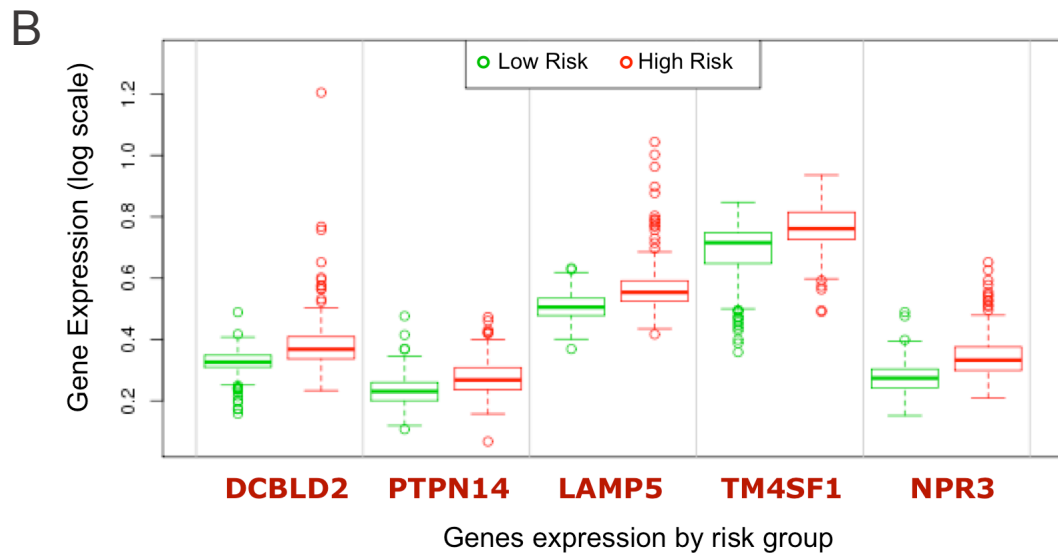

Supplement: 12864_2018_5193_MOESM5_ESM.pdf [file 12864_2018_5193_MOESM5_ESM.pdf]
